# Supplementary material
Source: PubMed Central journal article supplement (PMC8592185)
Supplement: tpmd200254.SD1.pdf [file tpmd200254.SD1.pdf]

Table S1. Timeline for different interventions. In Stages II and III, IRS was applied 6 months after the start of interventions

| Time (days) | Stage I    | Stage II        | Stage III             | Simulations   |
|-------------|------------|-----------------|-----------------------|---------------|
| 0           | LLIN       |                 |                       | Figure S1     |
|             | PBO-LLIN   |                 |                       | Figure S1     |
|             | LLIN + IRS |                 |                       | Figure S2     |
| 366         |            | PBO-LLIN        |                       | Figure S3     |
|             |            | PBO-LLIN + LLML |                       | Figure S3     |
|             |            | PBO-LLIN + IRS  |                       | Figure S3     |
| 731         |            |                 | PBO-LLIN              | Figures S4/S5 |
|             |            |                 | PBO-LLIN + LLML + IRS | Figure S4     |
|             |            |                 | PBO-LLIN + IRS + LLML | Figure S5     |

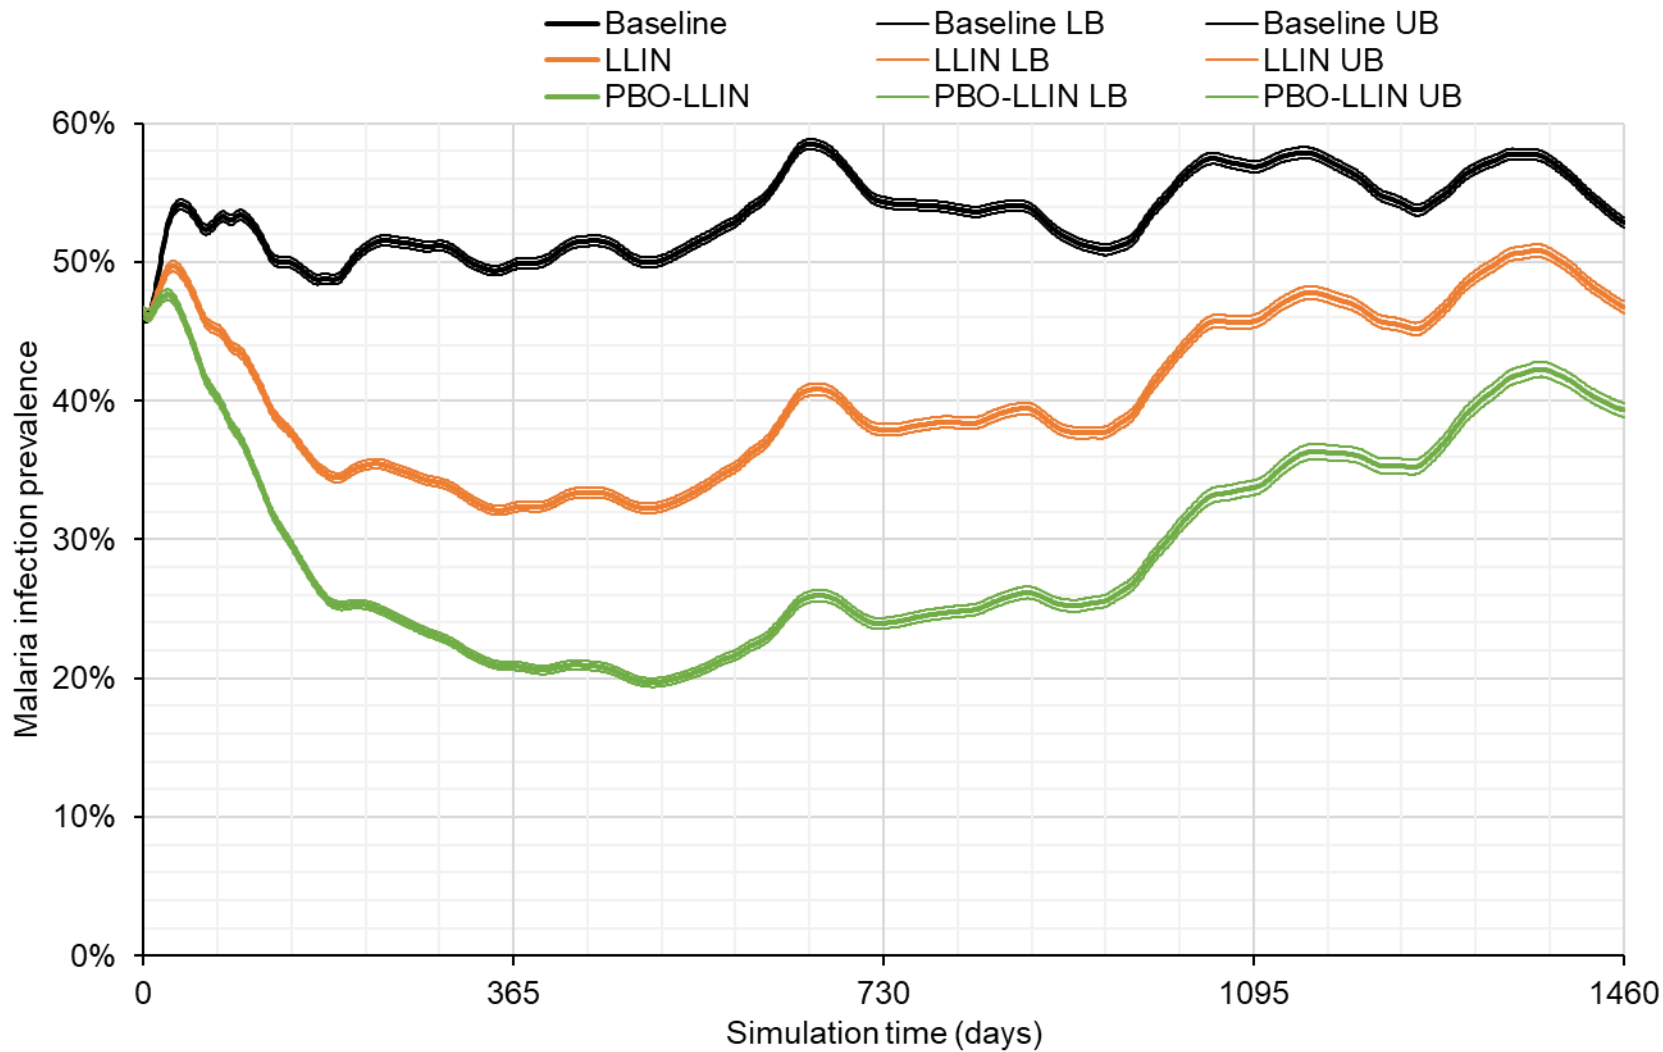

**Figure S1.** Simulated malaria infection prevalence rates at baseline, long-lasting insecticidal net (LLIN) intervention and piperonyl butoxide-treated LLIN (PBO-LLIN) intervention. LB/UB represents lower/upper boundary of 95% confidence interval.

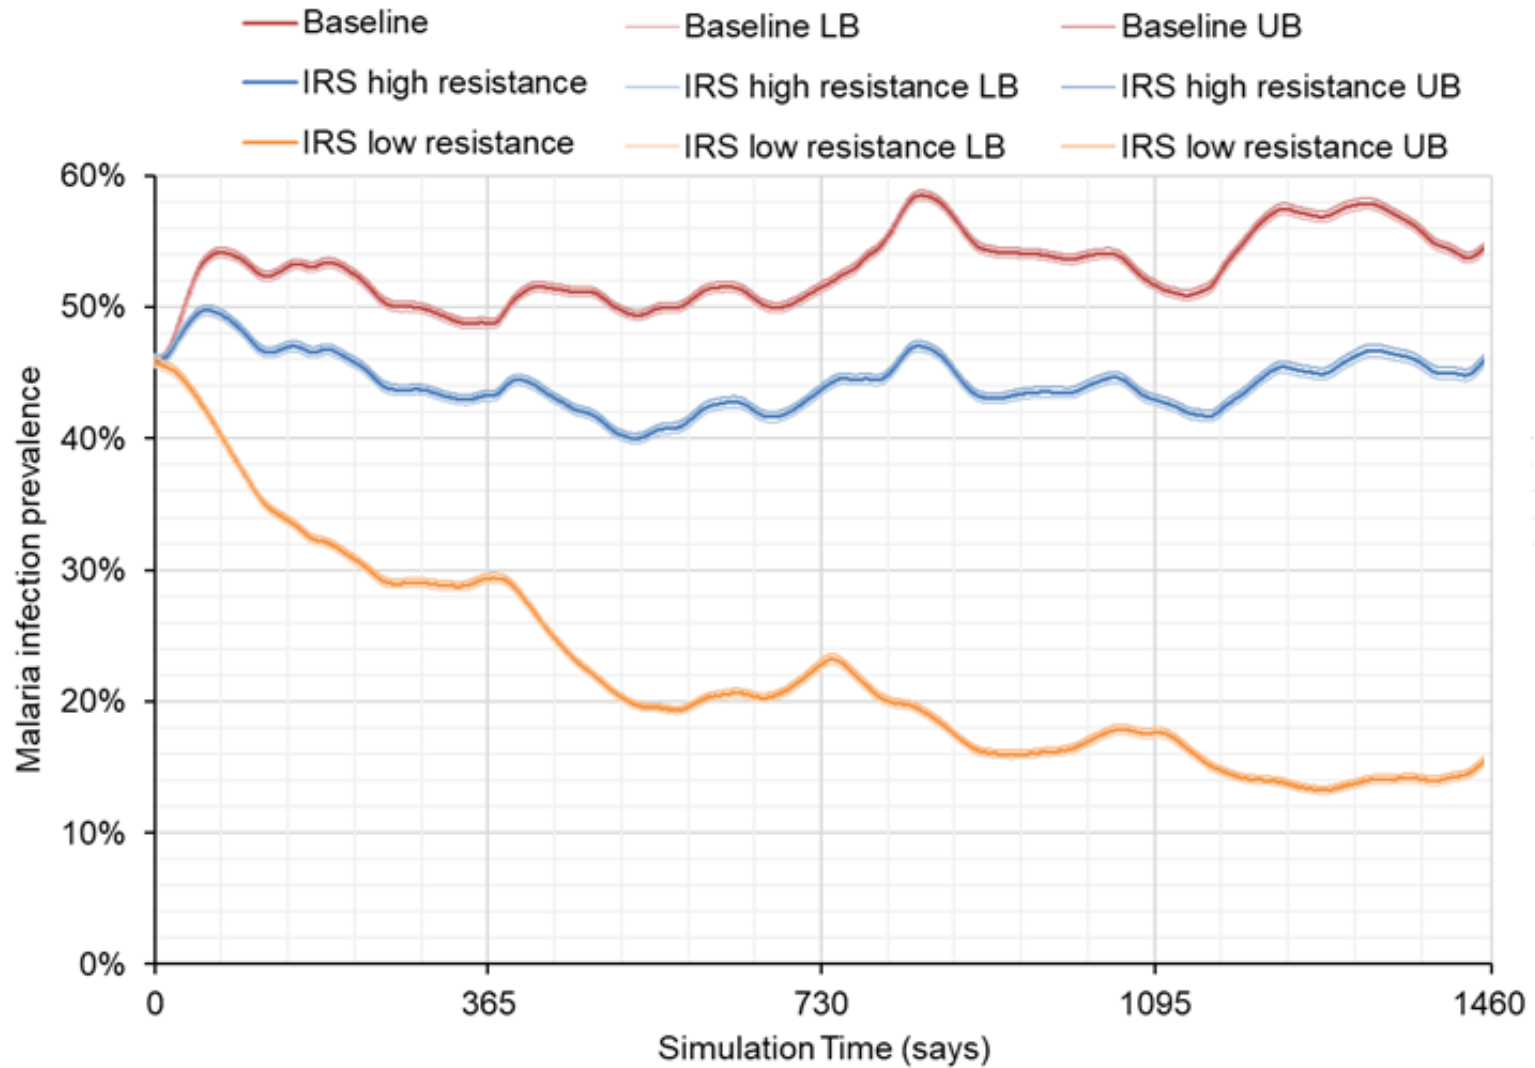

**Figure S2.** Simulated malaria infection prevalence rates at baseline and indoor residual spraying (IRS) using high vector-resistant insecticides or alternative low vector-resistant insecticides. LB/UB represents lower/upper boundary of 95% confidence interval.

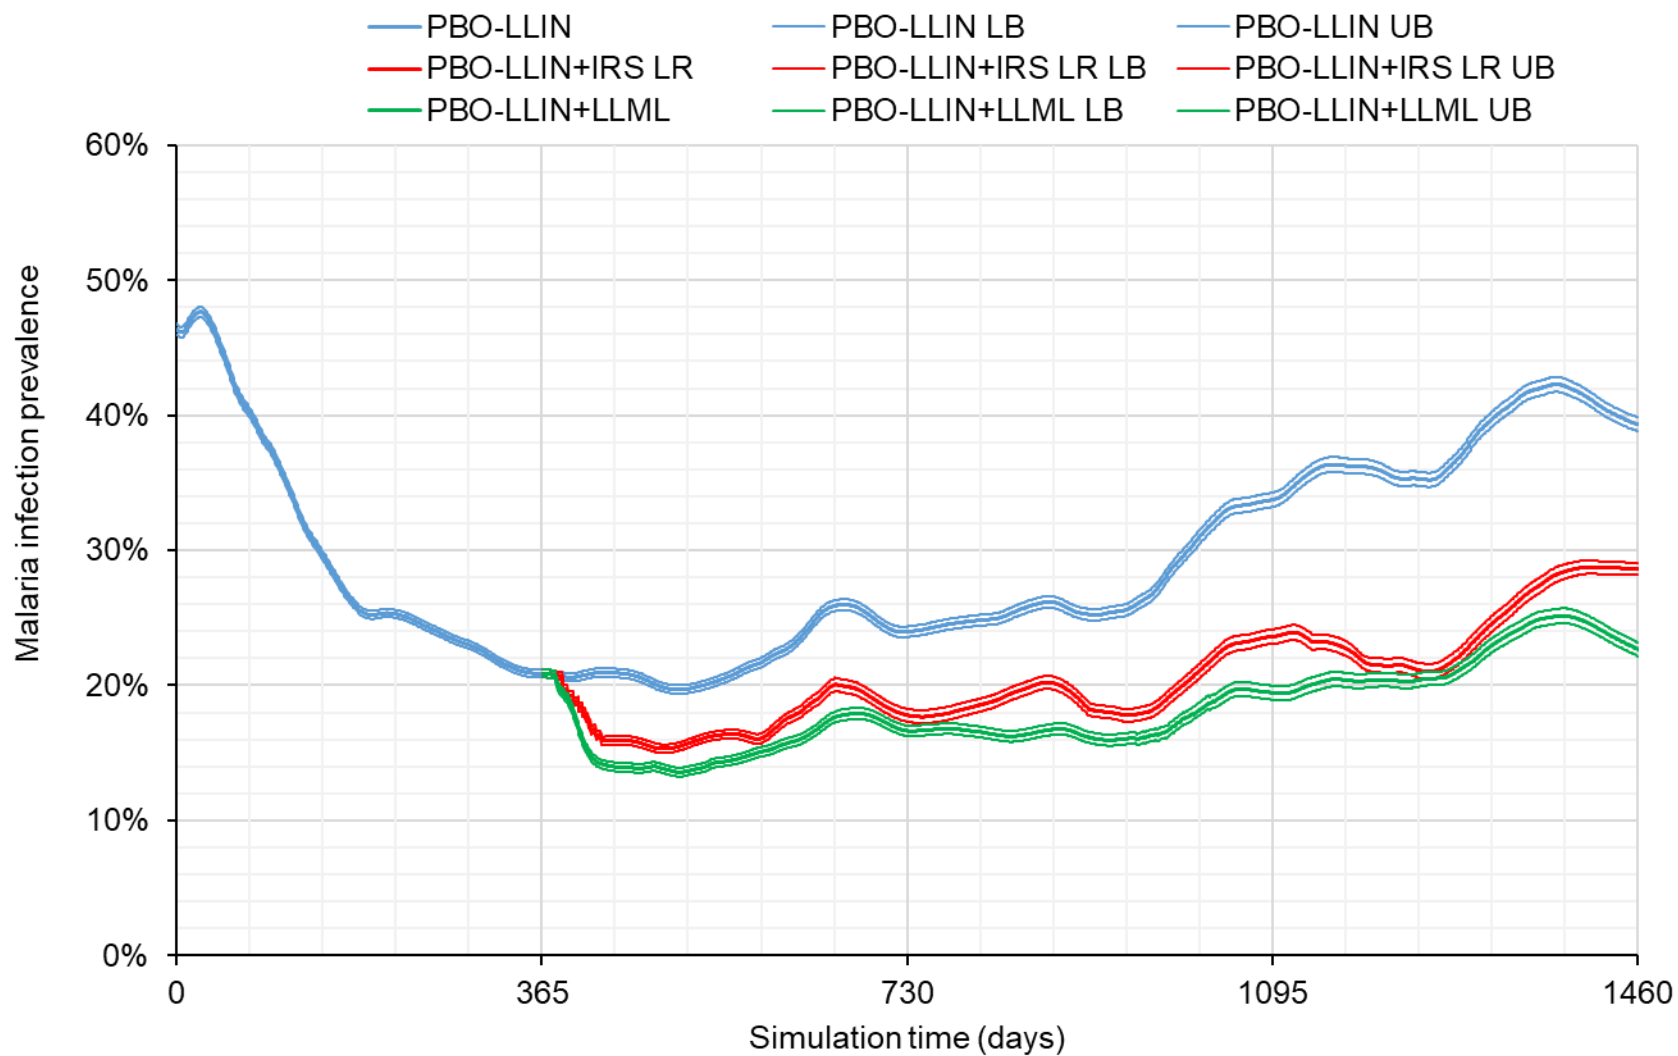

**Figure S3.** Simulated malaria infection prevalence rates with piperonyl butoxide-treated long-lasting insecticidal net (PBO-LLIN) intervention as baseline, against PBO-LLIN plus indoor residual spraying (PBO-LLIN+IRS) or PBO-LLIN plus long-lasting microbial larviciding (PBO-LLIN+LLML). LB/UB represents lower/upper boundary of 95% confidence interval. IRS LR represents IRS using low vector-resistant insecticides.

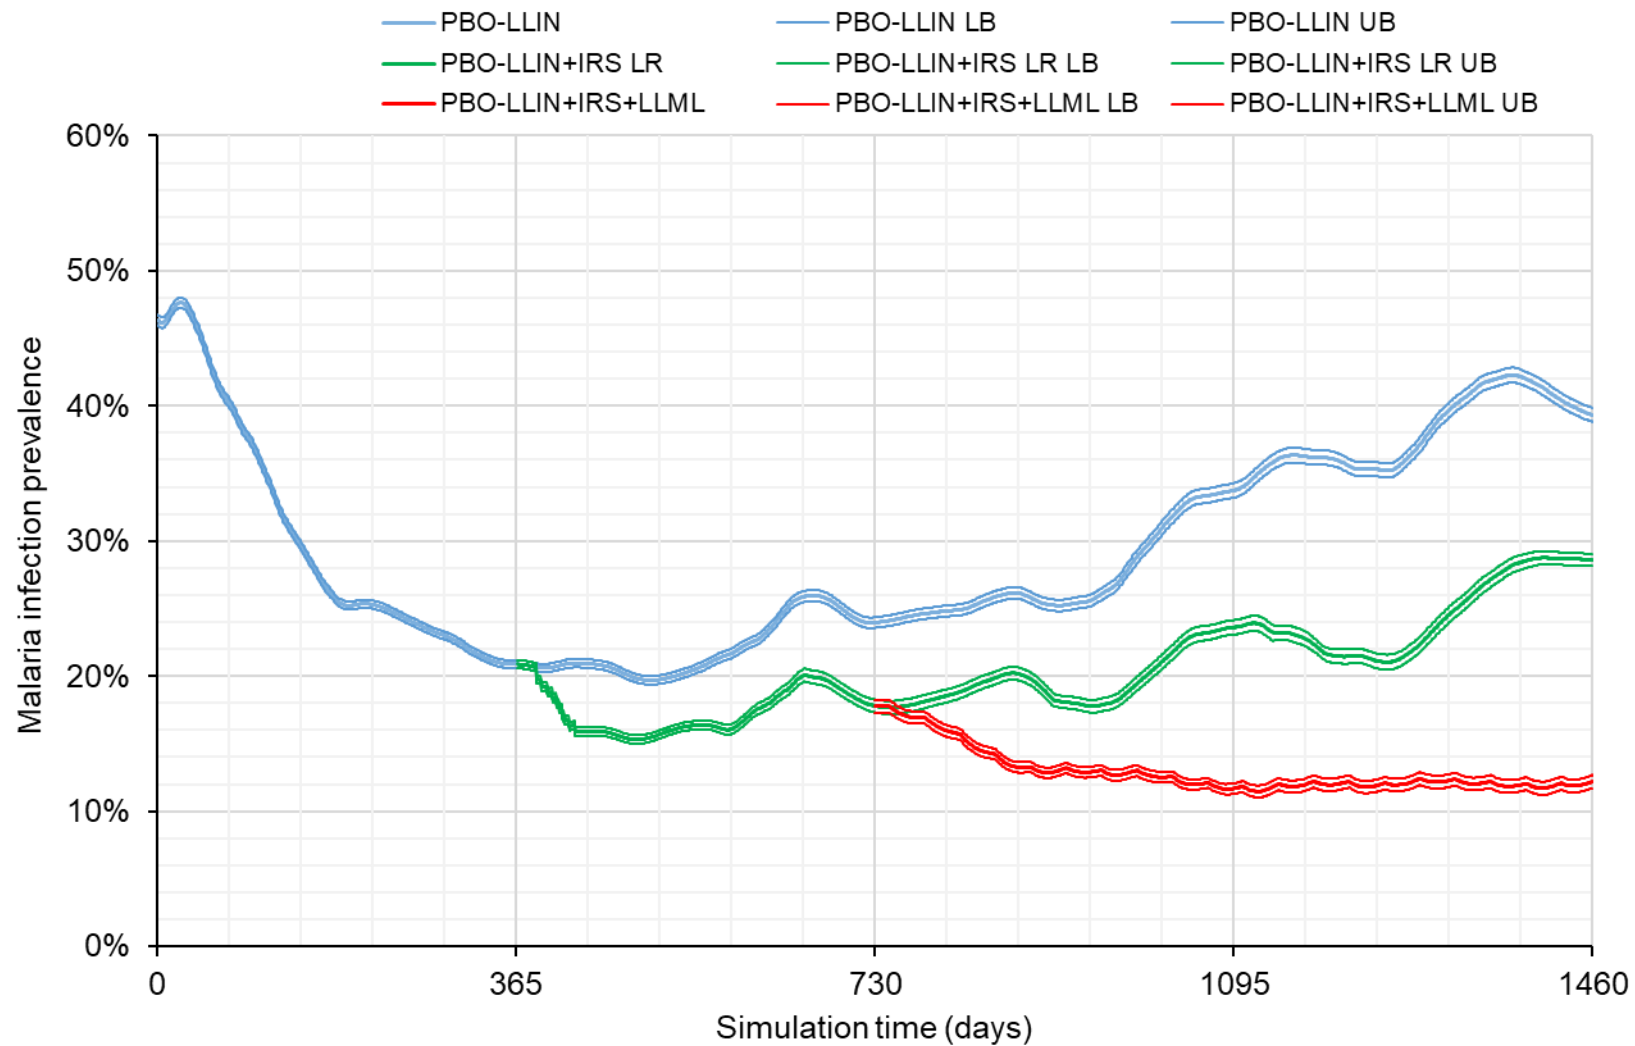

**Figure S4.** Simulated malaria infection prevalence rates with piperonyl butoxide-treated long-lasting insecticidal net (PBO-LLIN) intervention as baseline, against PBO-LLIN plus indoor residual spraying with alternative insecticides (PBO-LLIN+IRS LR), followed by adding long-lasting microbial larviciding (PBO-LLIN+IRS+LLML). LB/UB represents lower/upper boundary of 95% confidence interval.

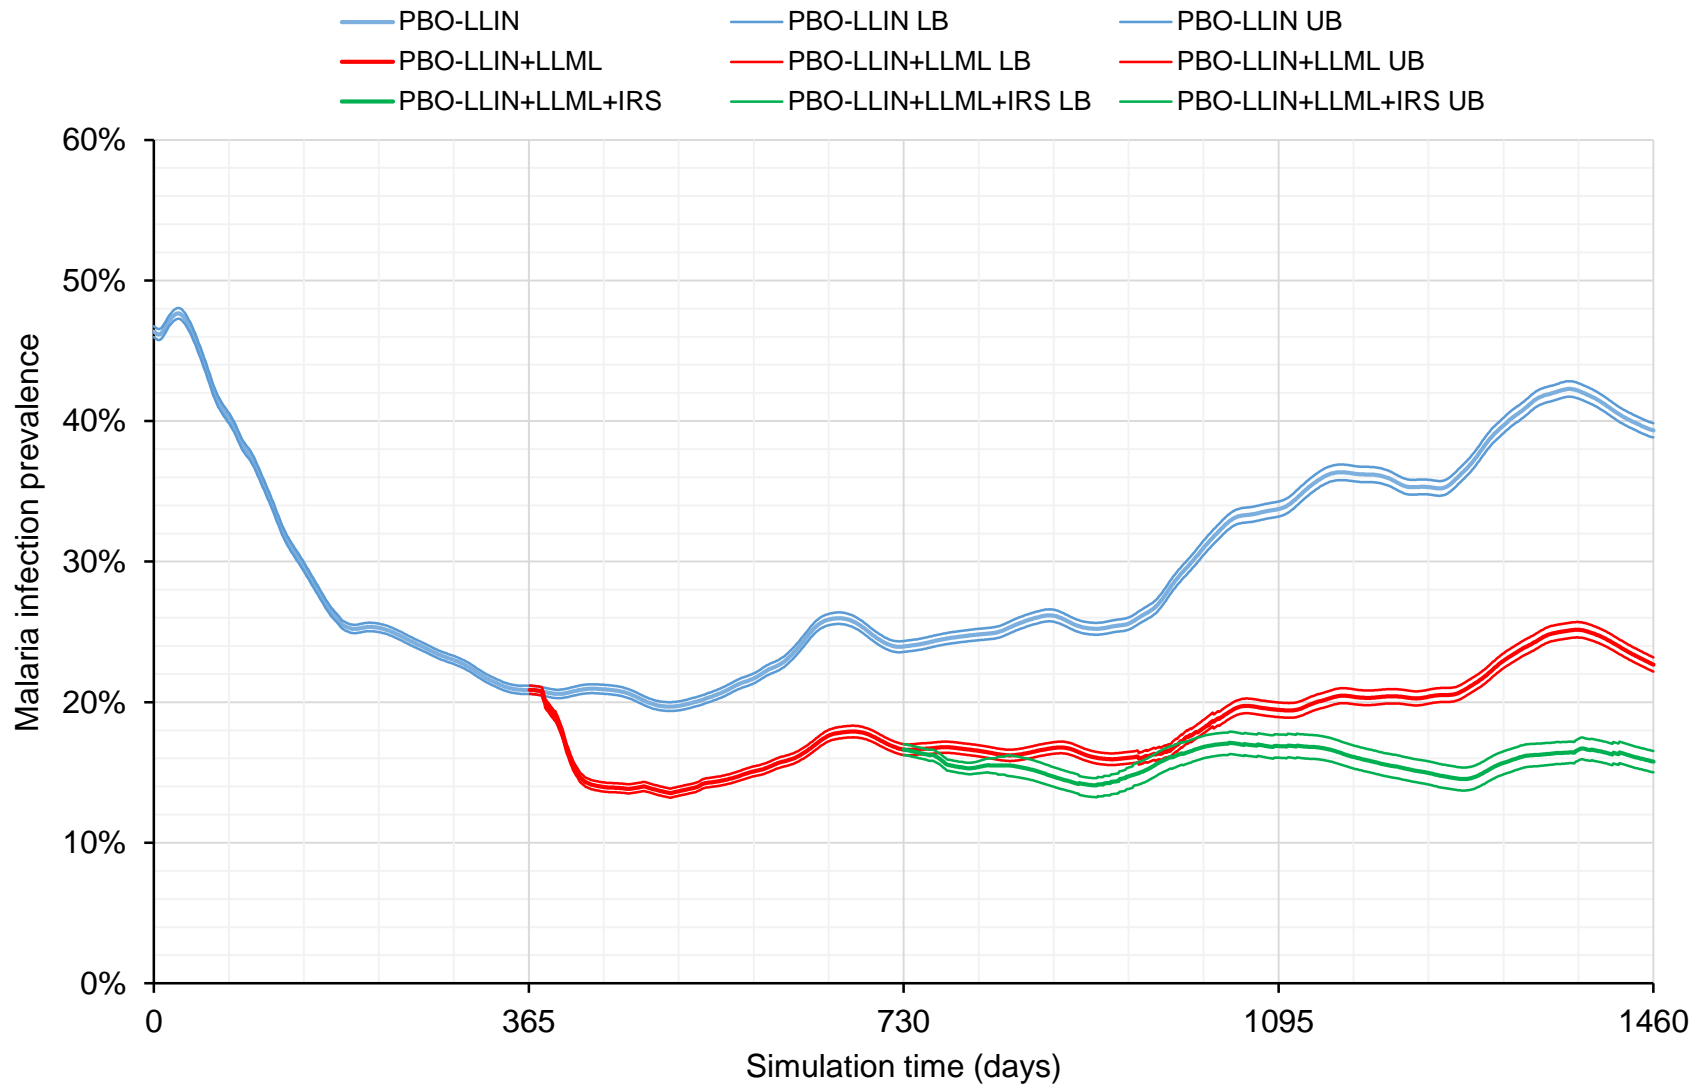

**Figure S5.** Simulated malaria infection prevalence rates with piperonyl butoxide-treated long-lasting insecticidal net (PBO-LLIN) intervention as baseline, against PBO-LLIN plus long-lasting microbial larviciding (PBO-LLIN+LLML), then followed by adding indoor residual spraying with alternative insecticides (PBO-LLIN+LLML+IRS LR). LB/UB represents lower/upper boundary of 95% confidence interval.
